# Supplementary material
Source: publisher figshare collection journal article supplement (https://geolsoc.figshare.com/ndownloader/files/3627129)
Supplement: Supplementary file 1 [file 3627129]

Sample,Epoch,SiO2,TiO2,Al2O3,Fe2O3,FeO,MnO,MgO,CaO,Na2O,K2O,P2O5,LOI,V,Ga,Sc,Cr,Ni,Co,Rb,Sr,Ba,Nb,Zr,Y,La,Ce,Pr,Nd,Sm,Eu,Gd,Tb,Dy,Ho,Er,Tm,Yb,Lu,Ta,Hf,Cs,Th,U,Pb,d18O[rock],d18O[cpx],d18O[ol],87Sr/86Sr,143Nd/144Nd,206Pb/204Pb,207Pb/204Pb,208Pb/204Pb,Synthem ,Data source
ALC31,1,50.55,0.67,15.41,2.63,5.4,0.15,9.61,10.91,2.28,1.33,0.25,0.82,0,0,38.3,724,123,36,34,710,403,6,86,12,22.7,42.2,0,17.3,3.38,1.22,0,0.49,0,0,0,0,1.64,0.28,0.28,1.82,0.77,4.08,3.14,0,5.6,5.44,0,0.703771,0.512837,0,0,0,Paleoalicudi,Peccerillo and Wu 1992; Peccerillo et al. 1993
ALC33,1,50.89,0.79,18.48,3.25,5.2,0.16,6.11,10.61,2.68,1.06,0.26,0.52,0,0,32.9,172,48,31,24,814,347,6,84,14,17.3,35.2,0,15,3.23,1.15,0,0.56,0,0,0,0,1.86,0.32,0.34,1.69,0.61,2.93,3.71,0,6.8,5.37,0,0.703906,0.512812,19.326,15.638,39.114,Paleoalicudi,"Peccerillo and Wu 1992; Peccerillo et al. 1993, 2004 "
ST185,1,50.92,0.79,17.03,4.56,4.35,0.17,6.8,10.98,2.48,1.02,0.29,0.56,0,0,37,27,58,0,20,631,296,12,90,20,18.9,39.9,0,18,3.58,1.47,0,0.62,0,0,0,0,1.98,0.32,0.37,2.13,0.82,3,1.2,0,0,0,0,0.703895,0.512844,19.311,15.628,39.075,Paleoalicudi,"Peccerillo and Wu 1992; Peccerillo et al. 1993, 2004 "
ALC34,1,51.74,0.65,16.27,1.71,6.36,0.16,9,10.01,2.35,1.03,0.23,0.5,0,0,41,696,103,35,27,644,311,5,78,23,18.5,37.1,0,15.6,3.07,1.04,0,0.46,0,0,0,0,1.87,0.28,0.45,1.93,0.72,3.84,1.46,0,6.8,5.41,0,0.704059,0.512804,0,0,0,Paleoalicudi,Peccerillo and Wu 1992; Peccerillo et al. 1993 
ST181,2,50.41,0.71,16.56,3.43,5.3,0.16,8.78,10.55,2.23,1.02,0.31,0.48,0,0,41.6,689,104,38,22,772,403,11,93,19,28.5,53.6,0,23.6,4.04,1.29,0,0.51,0,0,0,0,1.83,0.27,0.5,1.58,0.52,4.69,2.05,0,0,0,0,0.70378,0.512849,19.33,15.62,39.07,Scoglio Galera,"Peccerillo and Wu 1992; Peccerillo et al. 1993, 2004; Francalanci et al., 1992 "
ST180,2,50.57,0.68,15.97,3.63,5.15,0.16,8.94,10.97,2.18,0.97,0.3,0.42,0,0,38,426,111,0,20,774,405,14,91,21,29.3,56.9,0,22.9,4.43,1.63,0,0.59,0,0,0,0,2.01,0.28,0.81,1.88,0.55,5,1.6,0,0,5.39,0,0.703768,0.51286,0,0,0,Scoglio Galera,Peccerillo and Wu 1992; Peccerillo et al. 1993
A9_Ali,2,51.1,0.69,16.93,3.96,3.82,0.09,8.2,10.45,2.52,0.95,0.29,0.99,223,13,0,0,0,0,24,583,343,7,63,17,21,40,4.01,16.45,3.5,1.06,3.44,0.49,2.86,0.6,1.7,0.23,1.48,0.24,0.44,1.64,0,3.78,1.07,5.15,0,0,0,,0,0,0,0,Scoglio Galera,Peccerillo et al. 2013
ALC63,2,51.19,0.67,15.84,3.2,4.84,0.15,8.92,10.57,2.1,1.38,0.3,0.85,0,0,39,741,144,32,39,719,479,8,77,0,27.7,47.9,0,22.2,4.37,1.29,0,0.52,0,0,0,0,1.53,0.24,0.3,1.85,0.6,4.7,0.7,0,0,0,0,0,0,0,0,0,Scoglio Galera?,Peccerillo and Wu 1992; Peccerillo et al. 1993 
ALC30,2,51.6,0.72,16.48,3.88,4.24,0.16,7.42,10.81,2.5,1.15,0.21,0.83,0,0,38.8,480,73,31,28,690,396,8,90,16,20.8,40.3,0,15.3,3.23,1.19,0,0.51,0,0,0,0,1.72,0.28,0.46,2.03,0.81,4.43,2.15,0,5.6,5.31,0,0.703845,0.512839,0,0,0,Scoglio Galera,Peccerillo and Wu 1992; Peccerillo et al. 1993 
ST182,2,51.73,0.65,15.74,2.16,6.11,0.16,8.78,10.55,2.23,0.93,0.2,0.68,0,0,42.8,817,114,37,31,547,263,6,81,14,19.1,39.6,0,16.9,3.02,1.04,0,0.52,0,0,0,0,1.67,0.3,0.26,1.84,0.85,3.8,1.34,0,0,5.23,0,0.704063,0.512807,19.218,15.658,39.08,Scoglio Galera,"Peccerillo and Wu 1992; Peccerillo et al. 1993, 2004 "
ST186,2,52.44,0.69,16.51,2.52,5.03,0.15,5.14,9.63,3.47,1.36,0.24,2.77,0,0,32.8,154,27,27,37,526,288,17,122,22,23.9,45.2,0,17.6,3.54,1.14,0,0.65,0,0,0,0,2.21,0.31,0.58,2.59,0.86,5.51,2.38,0,0,0,0,0,0,0,0,0,Scoglio Galera,"Peccerillo and Wu 1992; Peccerillo et al. 1993, 2004 "
ST179,3,52.84,0.68,16.9,1.86,5.84,0.14,7.13,9.99,2.44,1.44,0.25,0.42,0,0,35,314,77,0,36,597,349,10,102,20,22.5,44.9,0,20.3,3.81,1.27,0,0.55,0,0,0,0,2.03,0.28,0.75,1.91,1.6,4.4,1.1,0,0,0,0,0.70409,0,0,0,0,Alicudi West,Peccerillo and Wu 1992; Peccerillo et al. 1993
ALC35,3,54.04,0.8,18.65,1.98,5.12,0.14,5.38,9.14,2.77,1.58,0.32,0.07,0,0,0,0,38,0,33,724,475,8,102,14,0,0,0,0,0,0,0,0,0,0,0,0,0,0,0,0,0,0,0,0,0,0,0,0,0,0,0,0,Alicudi West,Peccerillo and Wu 1992; Peccerillo et al. 1993
ALC32,3?,55.95,0.88,18.49,2.01,4.2,0.12,2.62,7.69,3.75,1.8,0.28,2.21,0,0,20.3,35,14,16,48,723,491,11,140,24,32.1,57.1,0,24,4.59,1.4,0,0.69,0,0,0,0,2.32,0.47,0.72,3.14,1.13,6.85,2.26,0,0,5.59,0,0.704049,0.512808,19.307,15.66,39.148,Angona?,"Peccerillo and Wu 1992; Peccerillo et al. 1993, 2004 "
ST188,4,51.45,0.72,16.34,4.27,4.35,0.16,6.96,11.03,2.1,1.07,0.23,1.27,0,0,0,0,66,0,27,611,269,9,79,21,0,0,0,0,0,0,0,0,0,0,0,0,0,0,0,0,0,0,0,0,0,0,0,0,0,0,0,0,Angona,Peccerillo and Wu 1992; Peccerillo et al. 1993
ALC40,4,52.82,0.8,16.56,2.72,4.93,0.15,8.04,9.58,2.54,1.28,0.26,0.32,0,0,0,0,88,0,36,629,365,12,107,25,0,0,0,0,0,0,0,0,0,0,0,0,0,0,0,0,0,0,0,0,0,0,0,0,0,0,0,0,Angona ,Peccerillo and Wu 1992; Peccerillo et al. 1993
ST187,4,53.2,0.78,16.15,3.76,4.11,0.14,7.13,9.61,2.68,1.27,0.25,0.87,0,0,0,0,93,0,32,547,328,7,104,20,0,0,0,0,0,0,0,0,0,0,0,0,0,0,0,0,0,0,0,0,0,0,0,0,0,0,0,0,Angona,Peccerillo and Wu 1992; Peccerillo et al. 1993 
ALC66,4,53.49,0.83,17.66,2.67,5.32,0.15,5.42,9.18,2.99,1.79,0.22,0.28,0,0,0,0,45,0,58,679,584,10,109,20,0,0,0,0,0,0,0,0,0,0,0,0,0,0,0,0,0,0,0,0,0,0,0,0,0,0,0,0,Angona,Peccerillo and Wu 1992; Peccerillo et al. 1993
A6_Ali,4,54.03,0.77,17.84,1.96,5.26,0.09,6.05,8.61,3.24,1.55,0.33,0.27,221,16,0,0,0,0,40,598,417,11,83,18,25,46,4.61,20.04,3.37,1.16,3.53,0.53,3.17,0.64,1.83,0.25,1.79,0.2,0.48,1.87,0,4.88,1.56,5.61,0,0,0,,0,0,0,0,Angona,Peccerillo et al. 2013
ALC07,4,54.88,0.67,16.97,3.4,4.2,0.14,5.46,9.2,2.71,1.34,0.21,0.82,0,0,33,146,47,0,26,570,307,11,99,23,23,43.8,0,19,3.64,1.23,0,0.5,0,0,0,0,2.11,0.3,0.69,2.15,0.5,5.5,1.7,0,6.9,5.23,5.29,0.703727,0.512854,0,0,0,Angona,"Peccerillo and Wu 1992; Peccerillo et al. 1993, 2004 "
ALC09,4,54.98,0.71,16.49,2.4,4.98,0.15,6.25,8.98,2.86,1.43,0.3,0.48,0,0,0,0,55,0,32,598,520,14,0,18,0,0,0,0,0,0,0,0,0,0,0,0,0,0,0,0,0,0,0,0,6.9,0,0,0,0,0,0,0,Angona,Peccerillo and Wu 1992; Peccerillo et al. 1993 
ALC37,4,55.01,0.7,16.47,3.01,4.44,0.14,6.39,8.84,2.86,1.38,0.23,0.52,0,0,33.5,370,60,27,30,647,501,11,115,21,27.5,49.2,0,18.8,3.49,1.2,0,0.56,0,0,0,0,1.88,0.29,0.56,2.19,0.59,6.76,1.53,0,0,0,0,0,0,0,0,0,Angona ,Peccerillo and Wu 1992; Peccerillo et al. 1993 
A11_Ali,4,55.07,0.69,16.49,3.24,3.74,0.09,6.49,8.71,3.18,1.27,0.32,0.71,223,15,0,0,0,0,28,570,499,11,83,16,27,49,4.66,19.46,3.74,1.11,2.74,0.43,3.01,0.55,1.54,0.26,1.3,0.29,0.5,1.57,0,6.14,1.81,4.88,0,0,0,,,,,,Angona,Peccerillo et al. 2013
ALC38,4,55.53,0.69,17.03,2,4.68,0.14,5.93,8.63,2.98,1.42,0.3,0.66,0,0,30.7,314,49,24,31,637,566,12,120,18,29.7,49.7,0,20.6,3.59,1.18,0,0.55,0,0,0,0,1.91,0.31,0.59,2.44,1.03,6.63,2.75,0,0,0,0,0.70356,0,0,0,0,Angona ,Peccerillo and Wu 1992; Peccerillo et al. 1993 
ALC36,4,55.71,0.68,16.81,2.54,4.4,0.14,6.33,8.46,2.97,1.41,0.27,0.27,0,0,32.3,367,61,26,30,614,545,10,111,21,30.8,53.7,0,21.3,3.59,1.3,0,0.53,0,0,0,0,1.89,0.32,0.57,2.27,0.7,6.6,1.52,0,0,0,0,0,0,0,0,0,Angona ,Peccerillo and Wu 1992; Peccerillo et al. 1993 
ST193,4,56.53,0.64,17.27,2.82,3.68,0.14,4.31,7.8,3.43,2.09,0.31,0.93,0,0,25.6,116,21,21,53,776,696,17,144,20,40.5,73.2,0,25.7,4.61,1.46,0,0.63,0,0,0,0,2.05,0.3,0.76,2.87,1.5,9.12,3.31,0,0,0,0,0,0,0,0,0,Angona,Peccerillo and Wu 1992; Peccerillo et al. 1993
ALC15,4,56.56,0.77,17.24,2.44,4.08,0.14,3.95,7.23,3.56,1.92,0.28,1.82,0,0,0,0,28,0,48,577,576,17,147,24,0,0,0,0,0,0,0,0,0,0,0,0,0,0,0,0,0,0,0,0,0,0,0,0,0,0,0,0,Angona,Peccerillo and Wu 1992; Peccerillo et al. 1993
ALC39,4,56.8,0.63,17.58,3.46,3.04,0.14,4.79,7.54,3.32,2.08,0.33,0.3,0,0,27.3,124,25,23,42,886,787,13,107,25,38.8,69.4,0,29.3,4.76,1.49,0,0.59,0,0,0,0,1.92,0.29,0.72,2.77,0.8,8.69,2.84,0,6.1,5.12,0,0.703433,0.512884,19.667,15.648,39.363,Angona ,"Peccerillo and Wu 1992; Peccerillo et al. 1993, 2004 "
A7_Ali,4,56.99,0.66,18.35,2.27,3.79,0.09,4.48,7.1,3.72,1.9,0.36,0.29,163,13,0,0,0,0,47,642,593,13,107,18,38,67,6.1,24.42,4.28,0.87,3.48,0.55,3.28,0.59,1.83,0.28,1.47,0.28,0.67,2.3,0.86,8.77,2.12,6.13,0,0,0,,0,0,0,0,Angona,Peccerillo et al. 2013
ALC67,4,57.18,0.87,17.92,2.37,4.68,0.14,3.2,6.88,3.66,2.4,0.33,0.37,0,0,0,0,12,0,79,647,799,19,160,31,0,0,0,0,0,0,0,0,0,0,0,0,0,0,0,0,0,0,0,0,0,0,0,0,0,0,0,0,Angona,Peccerillo and Wu 1992; Peccerillo et al. 1993
ALC17,4,57.4,0.69,17.71,2.02,4.4,0.14,4.03,7.24,3.33,2,0.35,0.69,0,0,0,0,27,0,56,648,643,21,147,22,0,0,0,0,0,0,0,0,0,0,0,0,0,0,0,0,0,0,0,0,0,0,0,0,0,0,0,0,Angona,Peccerillo and Wu 1992; Peccerillo et al. 1993
ALC08,4,57.72,0.73,17.11,0,4.84,0.15,5.89,7.82,3.04,1.47,0.28,1.02,0,0,0,0,48,0,25,539,549,13,103,19,0,0,0,0,0,0,0,0,0,0,0,0,0,0,0,0,0,0,0,0,0,0,0,0.703501,0.512889,19.374,15.655,39.207,Angona,"Peccerillo and Wu 1992; Peccerillo et al. 1993, 2004 "
ALC18,4,57.9,0.67,17.82,1.77,4.4,0.14,3.98,7.15,3.34,2.04,0.36,0.43,0,0,0,0,28,0,55,657,662,20,145,24,0,0,0,0,0,0,0,0,0,0,0,0,0,0,0,0,0,0,0,0,0,0,0,0,0,0,0,0,Angona,Peccerillo and Wu 1992; Peccerillo et al. 1993
ALC41,4,58.5,0.64,18.16,1.27,4.24,0.13,3.65,6.51,3.63,2.33,0.45,0.49,0,0,20.8,69,21,17,57,778,745,16,171,23,47.1,80.2,0,29.9,4.64,1.45,0,0.63,0,0,0,0,2.07,0.36,0.95,3.1,1.48,10.9,3.67,0,7.3,5.39,0,0.7035,0.51289,0,0,0,Angona ,"Peccerillo and Wu 1992; Peccerillo et al. 1993, 2004 "
ALC13,5,51.19,0.8,17.16,2.95,5.96,0.17,6.98,10.7,2.27,0.94,0.3,0.6,0,0,41,132,47,23,13,651,370,10,74,20,23.1,45.8,0,20.6,4.08,1.45,0,0.57,0,0,0,0,2.05,0.31,0.57,1.96,0.48,4.3,1.2,0,0,0,0,0.70358,0.51289,19.543,15.672,39.309,Spano,"Peccerillo and Wu 1992; Peccerillo et al. 1993, 2004 "
A3_Ali,5,51.42,0.72,16.98,7.71,0.87,0.1,7.16,10.36,2.25,0.94,0.3,1.19,221,14,0,0,0,0,23,606,260,7,56,17,19,38,4.17,18.12,3.54,0.95,4.11,0.5,3.42,0.63,1.78,0.26,1.53,0.28,0.36,1.34,0.95,3.02,0.89,3.31,0,0,0,,0,0,0,0,Spano,Peccerillo et al. 2013
ALC14,5,51.61,0.79,16.78,3.59,5.4,0.17,6.88,10.81,2.26,0.97,0.28,0.45,0,0,0,0,48,0,15,651,350,14,80,19,0,0,0,0,0,0,0,0,0,0,0,0,0,0,0,0,0,0,0,0,0,0,0,0,0,0,0,0,Spano,Peccerillo and Wu 1992; Peccerillo et al. 1993 
ALC12,5,52.75,0.76,16.74,2.48,5.92,0.16,6.81,10.3,2.46,1.02,0.25,0.35,0,0,0,0,43,0,15,656,363,10,82,21,0,0,0,0,0,0,0,0,0,0,0,0,0,0,0,0,0,0,0,0,0,0,0,0,0,0,0,0,Spano,Peccerillo and Wu 1992; Peccerillo et al. 1993
ALC11,5,54.79,0.77,16.77,2.63,4.88,0.14,6.09,9.05,2.78,1.48,0.27,0.33,0,0,32,203,55,0,25,618,506,14,100,24,26.4,52.9,0,23.3,4.22,1.51,0,0.67,0,0,0,0,2.03,0.31,1.01,2.21,0.45,6.4,1.6,0,7.1,5.33,5.16,0.703669,0.512864,19.52,15.64,39.2,Spano dyke,"Peccerillo and Wu 1992; Peccerillo et al. 1993, 2004; Francalanci et al., 1992 "
ALC55,5,57.46,0.72,17.06,3.17,3.84,0.14,4.14,7.42,3.36,2.22,0.32,0.15,0,0,0,0,17,0,47,734,837,18,132,25,0,0,0,0,0,0,0,0,0,0,0,0,0,0,0,0,0,0,0,0,0,0,0,0,0,0,0,0,Spano?,Peccerillo and Wu 1992; Peccerillo et al. 1993
ST192,5,57.86,0.63,16.51,2.75,3.84,0.13,4.47,7.41,3.38,2.1,0.32,0.54,0,0,0,0,25,0,49,722,680,16,138,21,0,0,0,0,0,0,0,0,0,0,0,0,0,0,0,0,0,0,0,0,0,0,0,0,0,0,0,0,Spano,Peccerillo and Wu 1992; Peccerillo et al. 1993
ALC65,6,55.05,0.77,17.2,3.3,3.96,0.15,4.55,8.52,3.26,1.87,0.3,1.06,0,0,25.9,0,29,25,61,636,656,10,125,21,34,55.6,0,23.2,4.16,1.22,0,0.63,0,0,0,0,1.88,0.26,0.73,2.91,1.12,7.1,2,0,0,0,0,0,0,0,0,0,Montagnole,Peccerillo and Wu 1992; Peccerillo et al. 1993
ALC48,6,56.23,0.68,17.65,1.68,4.24,0.13,5.07,6.38,4.2,2.09,0.5,0.71,0,0,41,134,25,0,56,725,695,11,149,36,25,48,0,21,4.1,1.5,0,0.54,0,0,0,0,2.2,0.31,0.55,2.03,1.79,4.3,1.2,0,5.9,5.31,0,0.703599,0.51289,0,0,0,Montagnole,"Peccerillo and Wu 1992; Peccerillo et al. 1993, 2004 "
A15_Ali,6?,56.27,0.92,18.94,3.31,3.3,0.09,2.43,7.56,3.78,1.75,0.37,1.28,169,16,0,0,0,0,48,623,453,11,107,23,30,56,5.46,24.43,4.51,0.91,4.1,0.62,4.04,0.69,2.43,0.36,2.08,0.27,0.65,2.26,1.09,6.18,1.61,5.46,0,0,0,0,0,0,0,0,Dike in Scoglio Galera (Alicudi West? Angona?),Peccerillo et al. 2013
A4_Ali,6,56.32,0.72,18.68,2.12,4.19,0.09,4,7.43,3.5,1.82,0.34,0.79,180,16,0,0,0,0,55,667,607,15,112,19,40,69,6.38,26.37,4.26,1.32,3.43,0.59,3.31,0.63,1.8,0.28,1.92,0.25,0.65,2.26,1.12,9.12,2.49,5.73,0,0,0,,0,0,0,0,Montagnole,Peccerillo et al. 2013
ST190,6,56.43,0.69,18.09,1.87,4.56,0.14,4.14,7.49,3.35,2.03,0.36,0.8,0,0,0,0,23,0,58,681,565,16,145,23,0,0,0,0,0,0,0,0,0,0,0,0,0,0,0,0,0,0,0,0,0,0,0,0,0,0,0,0,Montagnole,"Peccerillo and Wu 1992; Peccerillo et al. 1993, 2004 "
ALC45,6,56.7,0.7,18.26,1.91,4.52,0.14,4.16,7.23,3.21,1.94,0.31,0.93,0,0,0,0,29,0,56,735,647,12,144,36,0,0,0,0,0,0,0,0,0,0,0,0,0,0,0,0,0,0,0,0,0,0,0,0,0,0,0,0,Montagnole,Peccerillo and Wu 1992; Peccerillo et al. 1993
ALC43,6,57.13,0.69,17.81,1.67,4.32,0.14,4.2,7.43,3.28,2.17,0.37,0.78,0,0,0,0,27,0,53,726,684,14,144,28,0,0,0,0,0,0,0,0,0,0,0,0,0,0,0,0,0,0,0,0,0,0,0,0,0,0,0,0,Montagnole,Peccerillo and Wu 1992; Peccerillo et al. 1993
ALC06,6,57.21,0.7,18.1,1.67,4.72,0.14,4.05,7.09,3.27,1.93,0.37,0.75,0,0,25.1,92,24,20,55,653,537,20,142,22,38.9,68.7,0,24.4,4.17,1.32,0,0.65,0,0,0,0,2.06,0.33,0.68,2.82,1.34,9.33,3.4,0,0,0,0,0.70358,0,0,0,0,Montagnole,Peccerillo and Wu 1992; Peccerillo et al. 1993
ALC44,6,57.21,0.68,17.85,1.79,4.28,0.13,4.2,7.16,3.35,2.07,0.41,0.88,0,0,23.9,96,26,19,54,718,669,13,151,35,39.3,67.9,0,29,4.36,1.33,0,0.64,0,0,0,0,2,0.26,0.77,2.97,1.29,9.14,2.67,0,0,0,0,0.70367,0,0,0,0,Montagnole,Peccerillo and Wu 1992; Peccerillo et al. 1993
ALC05,6,57.33,0.67,17.93,1.81,4.36,0.14,3.86,7.1,3.32,2.1,0.35,1.02,0,0,0,0,24,0,60,703,656,16,137,21,0,0,0,0,0,0,0,0,0,0,0,0,0,0,0,0,0,0,0,0,0,0,0,0,0,0,0,0,Montagnole,Peccerillo and Wu 1992; Peccerillo et al. 1993
ALC01,6,57.64,0.7,17.7,1.91,4.44,0.14,4.05,7.14,3.42,2.05,0.35,0.45,0,0,0,0,26,0,57,657,670,21,152,22,0,0,0,0,0,0,0,0,0,0,0,0,0,0,0,0,0,0,0,0,0,0,0,0,0,0,0,0,Montagnole,Peccerillo and Wu 1992; Peccerillo et al. 1993
ST178,6,57.84,0.59,17.11,1.71,3.97,0.13,3.81,6.25,4.5,1.82,0.35,1.87,0,0,22.7,85,15,19,55,595,427,14,135,18,43.1,71.8,0,22.4,4.34,1.36,0,0.62,0,0,0,0,1.95,0.34,0.69,2.92,1.08,9.63,2.44,0,0,0,0,0,0,0,0,0,Montagnole,Peccerillo and Wu 1992; Peccerillo et al. 1993
ALC42,6,57.85,0.66,17.84,1.5,4.2,0.13,4.25,6.85,3.71,2.15,0.38,0.47,0,0,0,0,26,0,53,738,715,15,151,39,0,0,0,0,0,0,0,0,0,0,0,0,0,0,0,0,0,0,0,0,0,0,0,0,0,0,0,0,Montagnole,Peccerillo and Wu 1992; Peccerillo et al. 1993
ALC04,6,58.07,0.68,17.99,1.88,4.22,0.14,3.66,6.58,3.4,2.13,0.4,0.86,0,0,0,0,21,0,58,679,715,22,154,22,0,0,0,0,0,0,0,0,0,0,0,0,0,0,0,0,0,0,0,0,0,0,0,0,0,0,0,0,Montagnole,Peccerillo and Wu 1992; Peccerillo et al. 1993
ALC20,6,58.2,0.66,18.18,2.24,3.8,0.13,3.8,6.62,3.5,2.1,0.34,0.42,0,0,23.2,82,23,19,54,651,736,19,148,19,44.1,76.9,0,26.2,4.57,1.43,0,0.64,0,0,0,0,1.98,0.31,0.84,2.99,1.14,10.9,2.89,0,0,0,0,0.70352,0,0,0,0,Montagnole,Peccerillo and Wu 1992; Peccerillo et al. 1993
ST189,6,58.22,0.67,17.61,1.71,4.31,0.13,3.97,6.82,3.6,2.27,0.39,0.22,0,0,21,47,21,0,63,678,659,19,134,23,41.5,78.3,0,29.3,4.87,1.61,0,0.7,0,0,0,0,2.23,0.35,1.18,3.08,1.23,10.5,2.8,0,0,0,0,0.703495,0.5129,19.531,15.668,39.302,Montagnole,Peccerillo and Wu 1992; Peccerillo et al. 1993 
ALC19,6,58.23,0.64,17.87,2.16,3.64,0.13,3.72,6.68,3.31,2.22,0.4,1,0,0,22.4,76,22,19,62,658,739,18,146,18,43,75.5,0,24.7,4.26,1.39,0,0.6,0,0,0,0,2.05,0.31,0.84,2.93,1.31,10.5,3.7,0,0,0,0,0,0,0,0,0,Montagnole,Peccerillo and Wu 1992; Peccerillo et al. 1993
ST191,6,58.23,0.62,18.05,1.22,4.19,0.12,3.81,6.59,3.59,2.27,0.33,0.92,0,0,0,0,16,0,62,645,674,18,157,23,0,0,0,0,0,0,0,0,0,0,0,0,0,0,0,0,0,0,0,0,0,0,0,0,0,0,0,0,Montagnole,Peccerillo and Wu 1992; Peccerillo et al. 1993
ALC03,6,58.25,0.63,18.07,1.31,4.48,0.13,3.66,6.48,3.48,2.17,0.42,0.92,0,0,0,0,22,0,58,661,712,20,151,19,0,0,0,0,0,0,0,0,0,0,0,0,0,0,0,0,0,0,0,0,0,0,0,0,0,0,0,0,Montagnole,Peccerillo and Wu 1992; Peccerillo et al. 1993
ST177,6,58.37,0.64,17.79,1.75,4.11,0.13,3.97,6.81,3.56,2.14,0.37,0.31,0,0,0,0,21,0,56,651,651,18,146,20,0,0,0,0,0,0,0,0,0,0,0,0,0,0,0,0,0,0,0,0,0,0,0,0,0,0,0,0,Montagnole,Peccerillo and Wu 1992; Peccerillo et al. 1994
ST195,6,58.64,0.62,17.76,1.81,3.84,0.12,3.97,6.59,3.65,2.27,0.37,0.3,0,0,0,0,18,0,61,666,659,15,151,19,0,0,0,0,0,0,0,0,0,0,0,0,0,0,0,0,0,0,0,0,0,0,0,0,0,0,0,0,Montagnole,Peccerillo and Wu 1992; Peccerillo et al. 1993
ALC21,6,58.77,0.64,17.97,1.83,3.92,0.13,3.65,6.53,3.53,2.22,0.38,0.43,0,0,0,0,23,0,58,664,735,20,149,21,0,0,0,0,0,0,0,0,0,0,0,0,0,0,0,0,0,0,0,0,0,0,0,0,0,0,0,0,Montagnole,Peccerillo and Wu 1992; Peccerillo et al. 1993
A5_Ali,6,58.84,0.77,18.86,4.71,0.98,0.07,2.23,5.73,4.2,2.15,0.39,1.07,137,16,0,0,0,0,52,686,852,23,139,22,42,77,7.16,28.39,5.43,1.01,4.35,0.57,3.73,0.8,2.29,0.32,2.28,0.31,1.34,2.99,0.97,9.88,2.24,6.92,0,0,0,0,0,0,0,0,Montagnole,Peccerillo et al. 2013
ALC02,6,59.03,0.64,17.7,1.74,4.12,0.13,3.52,6.29,3.72,2.26,0.45,0.39,0,0,20,63,21,17,61,696,767,21,160,22,48.8,84.2,0,29.9,4.54,1.53,0,0.65,0,0,0,0,2.1,0.41,0.91,3.25,1.17,11.8,3.5,0,0,0,0,0.70353,0,0,0,0,Montagnole,Peccerillo and Wu 1992; Peccerillo et al. 1993
ALC46,6,59.49,0.78,18.03,2.56,3.12,0.11,2.67,5.97,4.07,2.41,0.43,0.35,0,0,0,0,15,0,55,761,909,23,172,39,0,0,0,0,0,0,0,0,0,0,0,0,0,0,0,0,0,0,0,0,0,0,0,0,0,0,0,0,Montagnole,Peccerillo and Wu 1992; Peccerillo et al. 1993
ALC47,6,59.51,0.78,17.85,2.69,3.04,0.12,2.65,6.24,3.99,2.46,0.41,0.26,0,0,0,0,13,0,56,797,898,25,175,34,0,0,0,0,0,0,0,0,0,0,0,0,0,0,0,0,0,0,0,0,6.2,4.97,0,0.703446,0.512894,0,0,0,Montagnole,"Peccerillo and Wu 1992; Peccerillo et al. 1993, 2004 "
ALC64,0,56.3,0.82,17.05,5.59,1.84,0.13,2.44,8.3,3.84,2.07,0.36,1.26,0,0,22.6,45,16,19,63,674,713,19,137,23,25.3,60.1,0,24.4,4.37,1.43,0,0.64,0,0,0,0,2.18,0.32,0.59,2.89,0.56,7.2,3.9,0,6.1,0,0,0.703635,0.512862,19.194,15.656,39.139,Paleoalicudi-Lithic in breccia,"Peccerillo and Wu 1992; Peccerillo et al. 1993, 2004 "
,,,,,,,,,,,,,,,,,,,,,,,,,,,,,,,,,,,,,,,,,,,,,,,,,,,,,,,
"From: Lucchi, F., Peccerillo, A., Keller, J., Tranne, C. A. & Rossi, P. L. (eds) 2013. The Aeolian Islands Volcanoes. Geological Society, London, Memoirs, 37.  � The Geological Society of London 2013.",,,,,,,,,,,,,,,,,,,,,,,,,,,,,,,,,,,,,,,,,,,,,,,,,,,,,,,
